# Supplementary material for: Breaking the lattice match of Pd on Au(111) nanowires: manipulating the island and epitaxial growth pathways to boost the oxygen reduction reactivity
Source: Royal Society of Chemistry journal article supplement (doi:10.1039/d0ta05867j), 2020-01-01
Supplement: d0ta05867j1.pdf [file d0ta05867j1.pdf]

## Supporting Information

### **Breaking the lattice match of Pd on Au(111) nanowires: manipulating the island and epitaxial growth pathways to boost oxygen reduction reactivity**

*Jingchun Wang, Xiaoyu Qiu,\* Keying Su, Siyuan Wang, Jiatian Li, and Yawen Tang\**

*Jiangsu Key Laboratory of New Power Batteries, Jiangsu Collaborative Innovation Center of Biomedical Functional Materials, School of Chemistry and Materials Science, Nanjing Normal University, Nanjing 210023, China.*

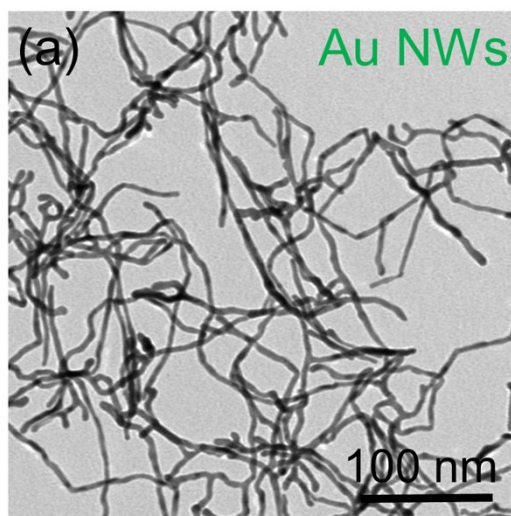

**Fig. S1** TEM image of the newly-prepared Au NWs as seed.

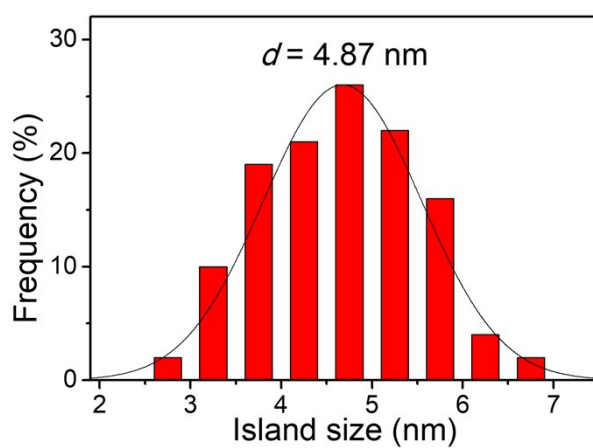

**Fig. S2** Histogram of size distribution of Pd islands on VW Au@Pd HNWs.

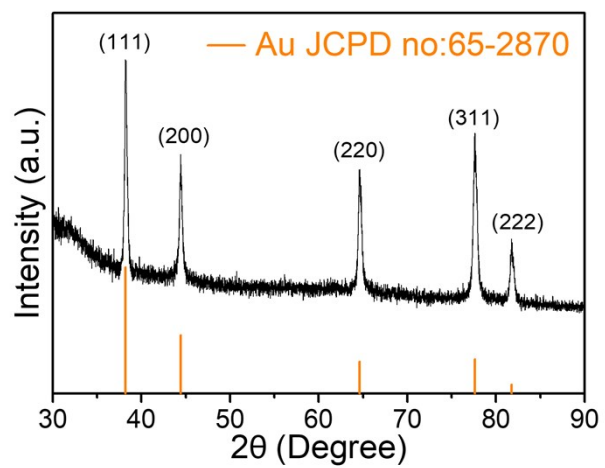

**Fig. S3** XRD pattern of pure Au NWs.

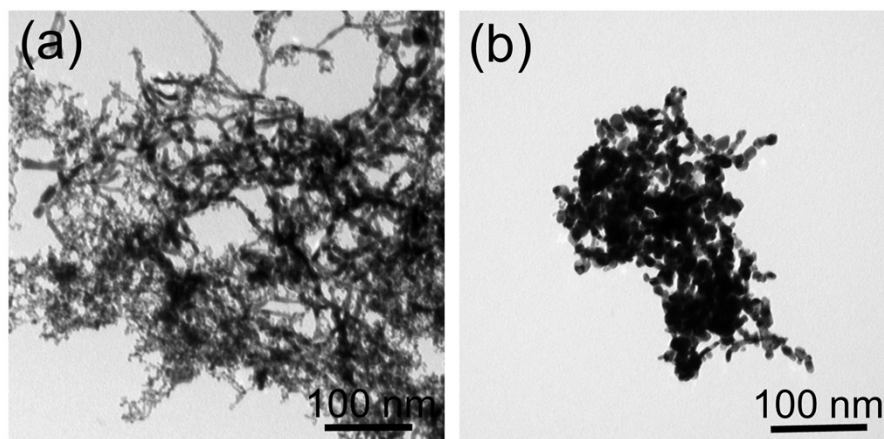

**Fig. S4** TEM images of the products prepared in the absence of PDDA at the pH value of (a) 5 and (b) 11.

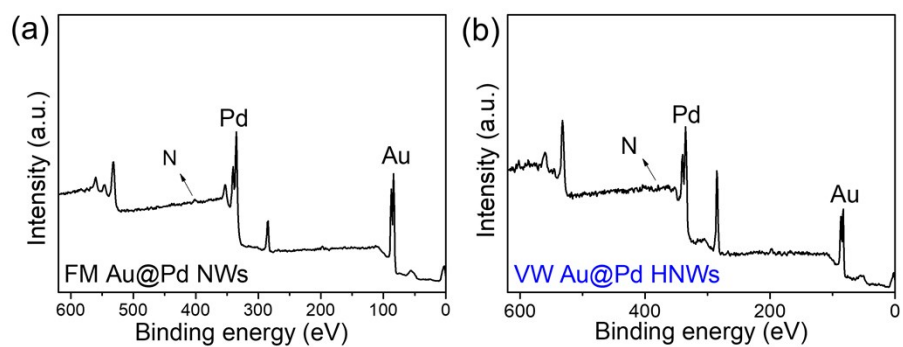

**Fig. S5** Full XPS survey spectrum of the (a) VW Au@Pd HNWs and (b) FM Au@Pd NWs.

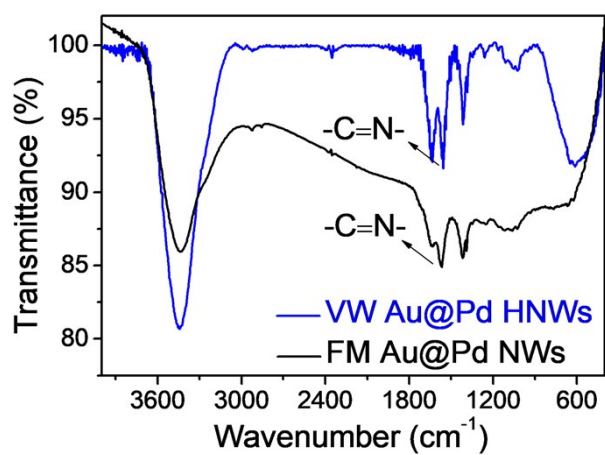

**Fig. S6** FTIR spectrum of the FM Au@Pd NWs and VW Au@Pd HNWs.

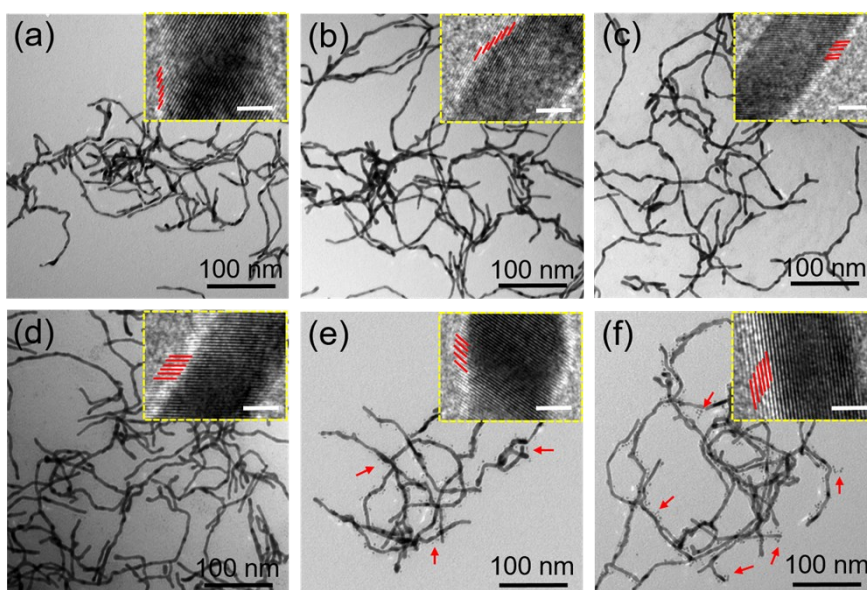

**Fig. S7** Representative TEM images of products using different dosage of  $K_2PdCl_4$  at the pH value of 5. (a) 0.125 mL, (b) 0.5 mL, (c) 1 mL, (d) 1.5 mL, (e) 2 mL and (f) 3 mL. Insert: HRTEM images of products showing the relevant shell thickness. The insert scale bar is 2 nm.

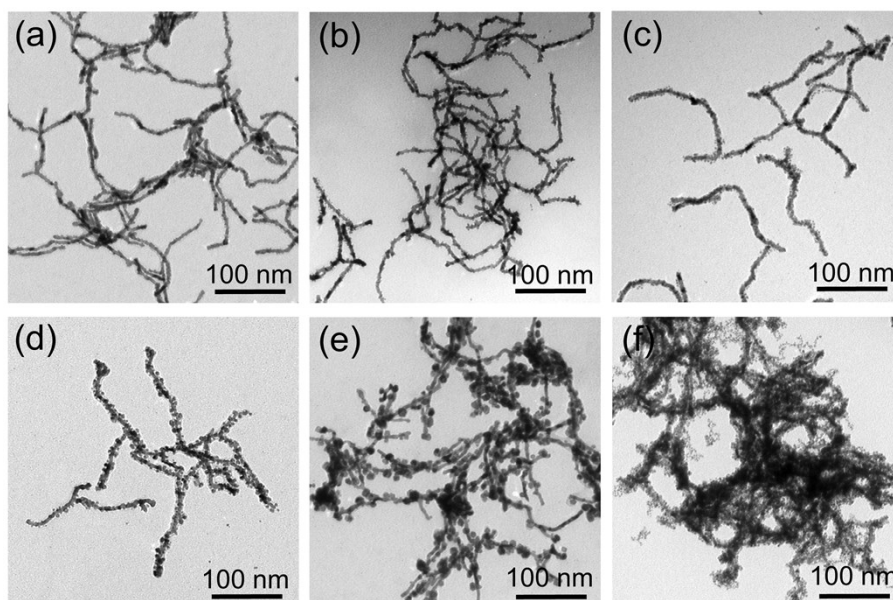

**Fig. S8** Representative TEM images of products using different dosage of  $K_2PdCl_4$  at the pH value of 11. (a) 0.125 mL, (b) 0.5 mL, (c) 1 mL, (d) 1.5 mL, (e) 2 mL and (f) 3 mL.

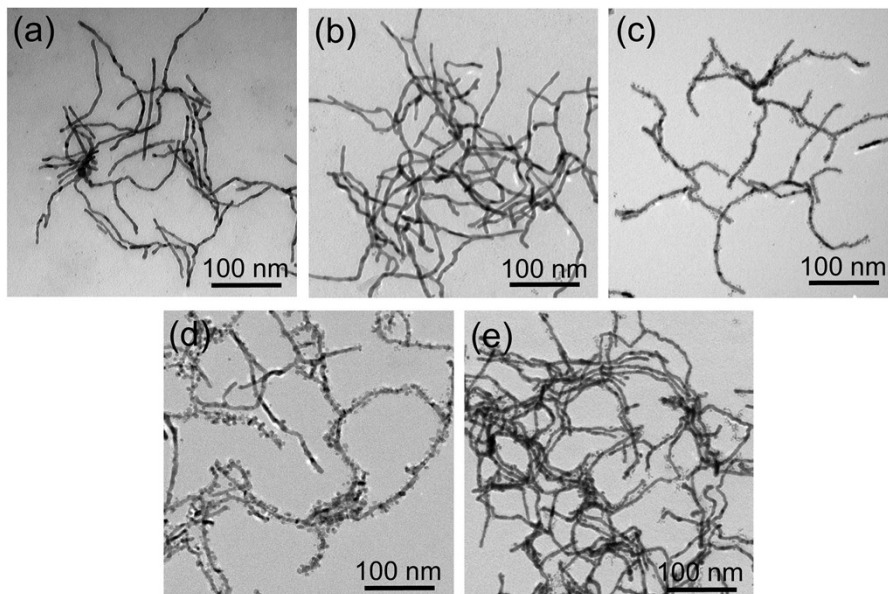

**Fig. S9** Representative TEM images of products obtained at different pH values. (a) 5, (b) 7, (c) 9, (d) 11 and (e) 13.

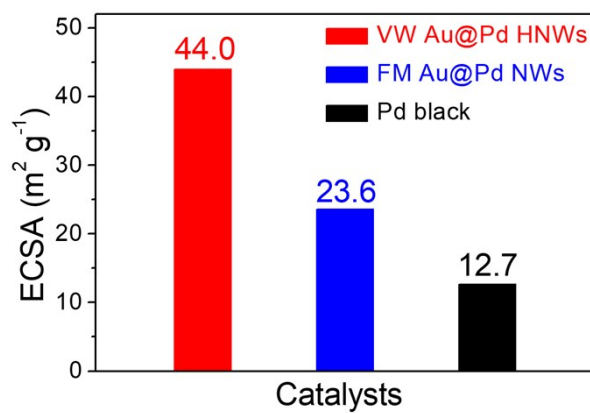

**Fig. S10** ECSA Histogram of VW Au@Pd HNWs, FM Au@Pd NWs and Pd black.



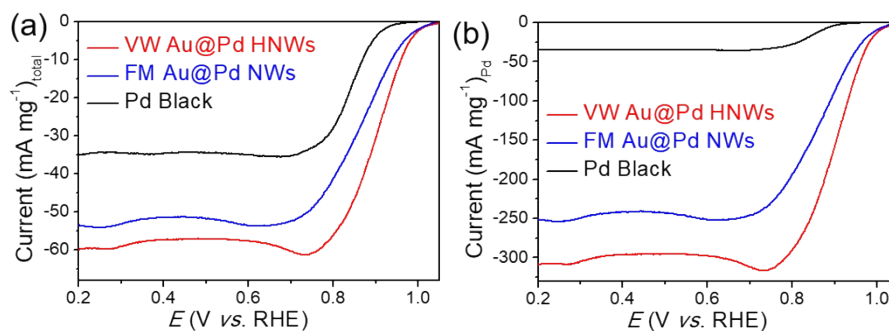

**Fig. S11** ORR polarization curves showing the mass activity of the VW Au@Pd HNWs, FM Au@Pd NWs and Pd black. (a) Total mass activity, (b) mass activity normalized to Pd.

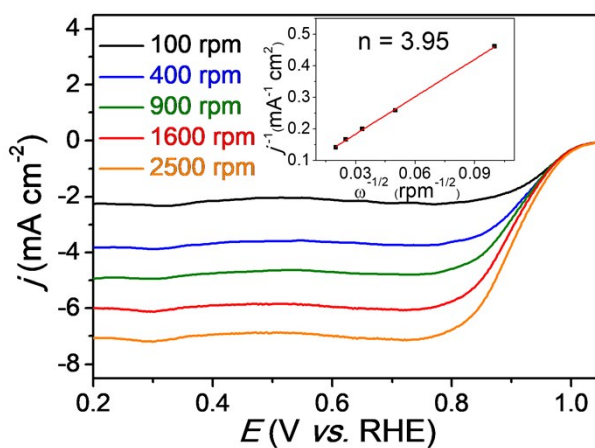

**Fig. S12** ORR polarization curves of VW Au@Pd HNWs in O<sub>2</sub>-saturated 0.1 M KOH solution at different rotation rates, insert: Koutecky-Levich plot ( $j^{-1}$  vs.  $\omega^{-1/2}$ ) at 0.60 V.

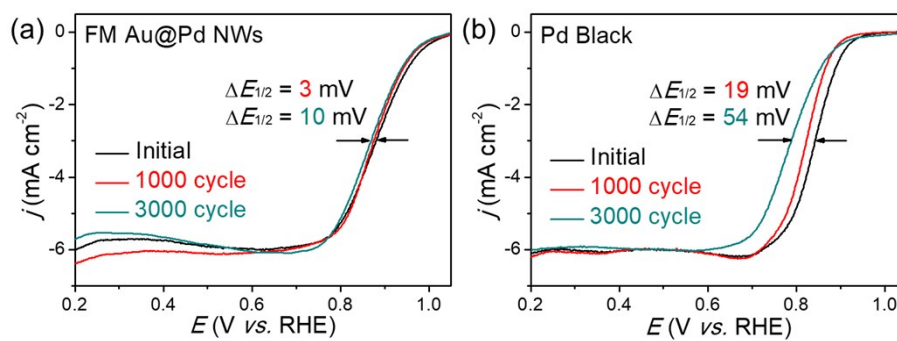

**Fig. S13** ORR polarization curves of the (a) FM Au@Pd NWs and (b) Pd black before and after ADTs in O<sub>2</sub>-saturated 0.1 M KOH solution at a scan rate of 5 mV s<sup>-1</sup>.

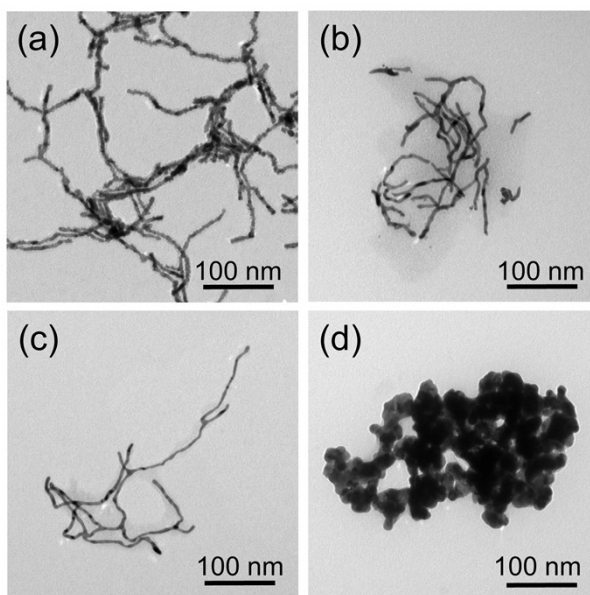

**Fig. S14** TEM images of (a) VW Au@Pd HNWs, (b) FM Au@Pd NWs, (c) Au NWs and (d) Pd black after ADTs.



**Table S1** Comparison of the ORR performance of VW Au@Pd HNWs and FM Au@Pd NWs with some state-of-the-art catalysts in 0.1 M KOH solution.

| Number | Catalysts                                | $E_{onset}$ (V vs. RHE) | $E_{1/2}$ (V vs. RHE) | ORR mass activity (at 0.9 V, mA mg <sup>-1</sup> ) | Reference                                         |
|--------|------------------------------------------|-------------------------|-----------------------|----------------------------------------------------|---------------------------------------------------|
| 1      | VW Au@Pd HNWs                            | 1.070                   | 0.910                 | 32.4 <sup>(total)</sup> ,<br>171.0 <sup>(Pd)</sup> | This work                                         |
| 2      | FM Au@Pd NWs                             | 1.042                   | 0.880                 | 19.1 <sup>(total)</sup> ,<br>92.0 <sup>(Pd)</sup>  | This work                                         |
| 3      | Au@Pd nanoparticles                      | ~ 0.950                 | 0.833                 | ~ 18.0 <sup>(total)</sup>                          | <i>J. Am. Chem. Soc.</i> 2018, 140, 8918-8923     |
| 4      | AuPdCo/C-intermetallic                   | ~0.975                  | ~0.850                | ~ 10.0 <sup>(total)</sup>                          | <i>Nat. Commun.</i> 2014, 5, 5185                 |
| 5      | PdMo bimetallic/C                        | ~1.050                  | 0.95                  | ~16.4 <sup>(total)</sup>                           | <i>Nature</i> , 2019, 574, 81-85                  |
| 6      | Au@PtPd mesoporous nanorod               | 1.010                   | 0.920                 | ~ 69.0 <sup>(Pd)</sup>                             | <i>ACS Appl. Energy Mater.</i> 2018, 1, 4891-4898 |
| 7      | Pd/Au NWs                                | ~0.890                  | 0.796                 | ~ 30.0 <sup>(Pd)</sup>                             | <i>Chem. Eur. J.</i> 2020, 26, 4019-4024          |
| 8      | Au/Cu <sub>40</sub> Pd <sub>60</sub> NPs | ~1.042                  | ~0.892                | ~ 140 <sup>(Pd)</sup>                              | <i>J. Am. Chem. Soc.</i> 2014, 136, 15026-15033   |
| 9      | Au-O-PdZn                                | ~0.980                  | ~0.900                | 105 <sup>(Pd)</sup>                                | <i>ACS Nano</i> 2019, 13, 5968-5974               |
| 10     | Pd@Pt core-conformal shell NCs           | ~0.990                  | 0.850                 | 260 <sup>(Pd)</sup>                                | <i>Nanoscale</i> , 2016,8, 1698-1703              |
